# Supplementary material for: Attenuating Pregnancy Weight Gain—What Works and Why: A Systematic Review and Meta-Analysis
Source: MDPI journal article supplement (doi:10.3390/nu10070944), 2018-07-22
Supplement: s1 [file s1]

**Table S4:** Description of physical activity interventions aimed at preventing excessive gestational weight gain.

| First author                  | Setting and date                     | Population                                                                                                                                                                                       | Intervention                                                                                                                                                                      | GWG <sup>a</sup> and GWG measure                                                                 | Quality <sup>b</sup>                                                                               |
|-------------------------------|--------------------------------------|--------------------------------------------------------------------------------------------------------------------------------------------------------------------------------------------------|-----------------------------------------------------------------------------------------------------------------------------------------------------------------------------------|--------------------------------------------------------------------------------------------------|----------------------------------------------------------------------------------------------------|
| Bacchi <sup>86</sup>          | Buenos Aires, Argentina              | Singleton and uncomplicated pregnancy.<br>Excluded: Contraindication to exercise, not planning to deliver at study hospital.<br>Sample: 140 (70 int, 70 con)<br>Final analyses: (49 int, 62 con) | Aquatic PA, 55-60 mins, 3 days per week.<br>Aerobic and strength exercises.<br>Duration: 26 weeks                                                                                 | Int: 12.7±2.6<br>Con: 13.9±4.3<br>$p = 0.1$<br>GWG: First prenatal visit – 37 weeks              | Random: Low<br>AC: Low<br>Blinding: Unclear<br>Data: Unclear<br>SR: Low<br>Other: Low              |
| Barakat <sup>72</sup><br>2013 | Madrid, Spain<br>Sep 2007 – Jan 2011 | Singleton pregnancy, sedentary, no contraindications to exercise.<br>Sample: 510 (255 int, 225 con)<br>Final analyses: 210 int, 218 con                                                          | Group exercise classes, 50-55 mins, 3 days per week. Aerobic, muscle strength and flexibility activities.<br>Duration: 28 weeks                                                   | Int: 11.6±3.7<br>Con: 13.3±4.1<br>$p < 0.01$<br>GWG: Pre-pregnancy - delivery                    | Random: Unclear<br>AC: Unclear<br>Blinding: Unclear<br>Data: Low<br>SR: High<br>Other: Unclear     |
| Barakat <sup>73</sup>         | Madrid, Spain                        | Singleton pregnancy.<br>Excluded: Not planning to give birth at study hospital, contraindications to exercise.<br>Sample: 80 (40 int, 40 con)<br>Final analyses: 34 int, 33 con                  | Group exercise classes, 35-45 mins, 3 days per week. Warm-up, core session of toning and very light resistance exercise, and cool-down.<br>Duration: 33 weeks                     | Int: 11.9±3.1<br>Con: 13.9±2.1<br>$p < 0.03$<br>GWG: Pre-pregnancy - delivery                    | Random: Low<br>AC: Unclear<br>Blinding: Unclear<br>Data: Low<br>SR: Unclear<br>Other: Unclear      |
| Barakat <sup>70</sup>         | Madrid, Spain<br>Jan 2000 - Mar 2002 | Singleton pregnancy, sedentary, no risk of preterm delivery, no contraindications to exercise.<br>Sample: 160 (80 int, 80 con)<br>Final analyses: 72 int, 70 con                                 | Group exercise classes, 35-40 mins, 3 days per week. Sessions were individually controlled and consisted of light-moderate PA.<br>Duration: 26 weeks                              | Int: 11.5±3.7<br>Con: 12.4±3.4<br>$p > 0.1$<br>GWG: Baseline - delivery                          | Random: Unclear<br>AC: Unclear<br>Blinding: Unclear<br>Data: Unclear<br>SR: High<br>Other: Unclear |
| Barakat <sup>71</sup>         | Madrid, Spain<br>Dec 2011 – Jan 2015 | Singleton pregnancy.<br>Excluded: diabetes or GDM at baseline, risk of preterm delivery.<br>Sample: 840 (420 int, 420 con)<br>Final analyses: 382 int 383 con                                    | Group exercise classes, 50-55 mins, 3 days per week. Warm-up, core session of moderate resistance exercise, and cool-down.<br>Duration: 30 weeks                                  | Int: 12.1±3.7<br>Con: 12.9±4.5<br>$p = 0.01$<br>GWG: Pre-pregnancy – last weight before delivery | Random: Low<br>AC: Unclear<br>Blinding: Unclear<br>Data: Low<br>SR: Unclear<br>Other: Unclear      |
| Barakat <sup>69</sup>         | Madrid, Spain                        | Singleton pregnancy<br>Excluded: Contraindications such as CVD, risk of premature labour, diabetes.<br>Sample: 100 (50 int, 50 con)<br>Final analyses: 40 int, 43 con                            | Group exercise classes, 35-45 mins, 3 days per week, 2 x land-based and 1 aquatic.<br>Warm- up, core session of light resistance activities, and cool-down.<br>Duration: 30 weeks | Int: 12.5±3.2<br>Con: 13.8±3.1<br>$p > 0.05$<br>GWG: Pre-pregnancy - delivery                    | Random: Unclear<br>AC: Unclear<br>Blinding: Unclear<br>Data: Low<br>SR: Unclear<br>Other: Unclear  |

|                          |                                          |                                                                                                                                                                                                                 |                                                                                                                                                                                                                                                                 |                                                                                           |                                                                                                   |
|--------------------------|------------------------------------------|-----------------------------------------------------------------------------------------------------------------------------------------------------------------------------------------------------------------|-----------------------------------------------------------------------------------------------------------------------------------------------------------------------------------------------------------------------------------------------------------------|-------------------------------------------------------------------------------------------|---------------------------------------------------------------------------------------------------|
| Barakat <sup>74</sup>    | Madrid, Spain                            | Singleton pregnancy.<br>Excluded: Contraindications to exercise.<br>Sample: 320 (160 int, 160 con)<br>Final analyses: 138 int 152 con                                                                           | Group exercise classes, 55-60 mins, 3 days per week. Warm- up, core session of toning and resistance activities, and cool-down.<br>Duration: 30 weeks                                                                                                           | Int: 11.9±3.7<br>Con: 13.7±4.1<br>$p < 0.01$<br>GWG: Pre-pregnancy - delivery             | Random: Low<br>AC : Unclear<br>Blinding: Unclear<br>Data: Low<br>SR: High<br>Other: Unclear       |
| Barakat <sup>87</sup>    | Madrid Spain<br>Mar 2014 – Jan 2017      | Singleton and uncomplicated pregnancy.<br>Excluded: Contraindications to exercise, not planning to deliver at study hospital.<br>Sample: 508 (255 int, 253 con)<br>Final analysis: 176 int, 149 con             | Supervised PA program, 55-60 mins, 3 days per week consisting of aerobic and resistance exercises.<br>Duration: 30 weeks                                                                                                                                        | Int: 12.0±3.3<br>Con: 12.8±3.9<br>$p = 0.1$<br>GWG: Baseline – 37 weeks                   | Random: Low<br>AC: Low<br>Blinding: Unclear<br>Data: Unclear<br>SR: Low<br>Other: Unclear         |
| Bisson <sup>82</sup>     | Quebec, Canada<br>Oct 2011 - Nov 2013    | Singleton pregnancy, > 18 years, obese.<br>Excluded: Contraindications to exercise, a high level of pre-gestational exercise.<br>Sample: 50 (25 int, 25 con)<br>Final analyses: 23 int, 22 con                  | A 12-week, supervised exercise program at a hospital-based centre. Participants were individually supervised once a week and invited to 2 more sessions per week. On non-training days women were encouraged to be as active as possible.<br>Duration: 12 weeks | Int: 12.3±4.0<br>Con: 12.2±5.9<br>$p = 0.03$<br>GWG: Pre-pregnancy - delivery             | Random: Low<br>AC: Low<br>Blinding: Unclear<br>Data: Low<br>SR: Low<br>Other: Low                 |
| Cavalcante <sup>78</sup> | Sao Paulo, Brazil<br>Mar 2002 - Nov 2004 | Singleton pregnancy, 16-20 weeks gestation, sedentary.<br>Excluded: > 2 caesarean births, contraindication to exercise.<br>Sample: 71 (34 int 37 con)<br>Final analyses: 34 int, 37 con                         | Water aerobic classes, 50 mins, 3 days per week. Sessions were in an indoor swimming pool and involved moderate-intensity exercises so that women worked at 70% capacity.<br>Duration: 20-24 weeks                                                              | Int: 14.3±2.1<br>Con: 15.1±1.6<br>$p = 0.38$<br>GWG: Pre-pregnancy - delivery             | Random: Low<br>AC: Low<br>Blinding: Unclear<br>Data: Unclear<br>SR: Unclear<br>Other: High        |
| Clapp <sup>76</sup>      | Ohio, United States                      | Singleton pregnancy, enrolled before conception.<br>Excluded: Substance use, premature labour, HTN, GDM, IUGR, failure to maintain exercise regimen.<br>Sample: 46 randomized<br>Final analyses: 22 int, 24 con | Weight-bearing exercise, 20 minutes, three to five times per week at an intensity between 55-60% of capacity.<br>Duration: 30 weeks                                                                                                                             | Int: 15.7±4.7<br>Con: 16.3±3.4<br><i>Not significant</i><br>GWG: Pre-pregnancy - delivery | Random: Unclear<br>AC: Unclear<br>Blinding: Unclear<br>Data: Low<br>SR: Unclear<br>Other: Unclear |

|                             |                                           |                                                                                                                                                                                                                                                                                                   |                                                                                                                                                                                                                                                                                                                                                                                                                                                                                                                                                                                      |                                                                                                                                                                |                                                                                                       |
|-----------------------------|-------------------------------------------|---------------------------------------------------------------------------------------------------------------------------------------------------------------------------------------------------------------------------------------------------------------------------------------------------|--------------------------------------------------------------------------------------------------------------------------------------------------------------------------------------------------------------------------------------------------------------------------------------------------------------------------------------------------------------------------------------------------------------------------------------------------------------------------------------------------------------------------------------------------------------------------------------|----------------------------------------------------------------------------------------------------------------------------------------------------------------|-------------------------------------------------------------------------------------------------------|
| Clapp <sup>34</sup>         | Ohio, United States                       | Singleton pregnancy, enrolled before conception, regularly exercising.<br>Excluded: Substance use, premature labour, mid-trimester bleeding, HTN, GDM, IUGR, failure to maintain exercise regimen.<br>Sample: 80 randomized<br>Final analyses: 26 Lo-Hi, 24 Mod-Mod, 25 Hi-Lo                     | <i>Lo-Hi:</i> Weight-bearing exercise (treadmill, step aerobics or stair stepper) 20 mins, 5 days per week until week 20, then gradually increasing to 60 mins by week 24 and maintain until the end of pregnancy.<br><i>Mod-Mod:</i> Weight-bearing exercise (treadmill, step aerobics or stair stepper) 40 mins, 5 days per week from 8 weeks to end of pregnancy<br><i>Hi-Lo:</i> Weight-bearing exercise (treadmill, step aerobics or stair stepper) 60 mins, 5 days per week until week 20, then gradually decreasing to 20 mins by the end of pregnancy.<br>Duration: 32 weeks | Lo-Hi: 12.0±4.1<br>Mod-Mod: 14.6±4.4<br>Hi-Lo: 15.5±4.5<br><i>GWG was significantly less in the Lo-Hi group</i><br>$p < 0.02$<br>GWG: Pre-pregnancy - delivery | Random: Unclear<br>AC: Unclear<br>Blinding: Unclear<br>Data: Unclear<br>SR: Unclear<br>Other: Unclear |
| Daly <sup>89</sup>          | Dublin, Ireland<br>Nov 2013 – Apr 2016    | Singleton pregnancy, > 18 years, <17 weeks gestation, BMI > 30, English speaking.<br>Excluded: Pre-existing diabetes, HTN, medications affecting insulin sensitivity<br>Sample: 88 randomized<br>Final analyses: 34 int, 42 con                                                                   | Supervised exercise classes, 50-60 mins, 3 days per week.<br>Duration: 27 weeks                                                                                                                                                                                                                                                                                                                                                                                                                                                                                                      | Int: 6.2±6.0<br>Con: 7.9±4.8<br>$p = 0.15$<br>GWG: Baseline - 36 weeks                                                                                         | Random: Low<br>AC: Low<br>Blinding: Unclear<br>Data: Unclear<br>SR: High<br>Other: Low                |
| Da Silva <sup>88</sup>      | Pelotas, Brazil<br>Apr 2014 – Mar 2016    | Singleton pregnancy, > 18 years, physically inactive.<br>Excluded: HTN, CVD, diabetes, history of miscarriage, preterm birth, BMI > 35, heavy smoker.<br>Sample: 639 (213 int, 426 con)<br>Final analyses: 85 int, 407 con                                                                        | Structured, individually supervised, moderate intensity exercise program, 60 mins, 3 days per week.<br>Duration: 24 weeks                                                                                                                                                                                                                                                                                                                                                                                                                                                            | Int: 12.7±5.7<br>Con: 12.9±6.5<br>$p = 0.2$<br>GWG: Baseline – 36 weeks                                                                                        | Random: Low<br>AC: Unclear<br>Blinding: Unclear<br>Data: Unclear<br>SR: Low<br>Other: Unclear         |
| Dekker Nitert <sup>84</sup> | Brisbane, Australia                       | Singleton pregnancy, >12 weeks gestation, obese.<br>Excluded: Contraindication to exercise, non-English speaking, type 1 diabetes, anemia, heart or lung disease, cerclage, hyperthyroidism, poorly controlled seizures, heavy smoker.<br>Sample: 50 randomized<br>Final analyses: 19 int, 16 con | At baseline, all participants attended a group education session regarding exercise, nutrition and GWG. Women were given an individualised exercise plan and attended monthly face-to-face consultations with physiotherapists.<br>Duration: 26 weeks                                                                                                                                                                                                                                                                                                                                | Int: 7.9±4.0<br>Con: 8.3±6.1<br>$p = 0.81$<br>GWG: Baseline – 36 weeks                                                                                         | Random: Unclear<br>AC: Unclear<br>Blinding: Unclear<br>Data: High<br>SR: Low<br>Other: Unclear        |
| Garnaes <sup>90</sup>       | Trondheim, Norway<br>Sept 2010 – Mar 2015 | Singleton pregnancy, >18 years, <18 weeks gestation, BMI > 28.<br>Excluded: Preterm labour risk, disease that could interfere with the intervention, habitual exercise.                                                                                                                           | Supervised exercise classes, 60 mins, 3 days per week. In addition, women asked to follow a home-based 50-min program 1 day per week.<br>Duration: 23 weeks                                                                                                                                                                                                                                                                                                                                                                                                                          | Int: 10.5±0.8<br>Con: 9.2±1.2<br>$p = 0.35$<br>GWG: Baseline - delivery                                                                                        | Random: Low<br>AC: Low<br>Blinding: Unclear<br>Data: Low<br>SR: Unclear                               |

|                          |                                             |                                                                                                                                                                                                                                                                                                                        |                                                                                                                                                                                                                                                |                                                                                                                                                                                   |                                                                                                   |
|--------------------------|---------------------------------------------|------------------------------------------------------------------------------------------------------------------------------------------------------------------------------------------------------------------------------------------------------------------------------------------------------------------------|------------------------------------------------------------------------------------------------------------------------------------------------------------------------------------------------------------------------------------------------|-----------------------------------------------------------------------------------------------------------------------------------------------------------------------------------|---------------------------------------------------------------------------------------------------|
|                          |                                             | Sample: 91 (46 int, 45 con)<br>Final analyses: 38 int, 36 con                                                                                                                                                                                                                                                          |                                                                                                                                                                                                                                                |                                                                                                                                                                                   | Other: Low                                                                                        |
| Garshasbi <sup>77</sup>  | Tehran, Iran<br>Apr 2003 -<br>Jan 2004      | Singleton pregnancy, 20-28 years, 17-22 weeks gestation, housewives or high-school graduates. Excluded: Contraindications to aerobic exercise, exercise before pregnancy, orthopaedic disease. Sample: 266 (161 int, 105 con)<br>Final analyses: 107 int, 105 con                                                      | 60 min program for strengthening abdominal muscles consisting of 15 movements, 3 days per week. Supervised by a midwife. Duration: 18-23 weeks                                                                                                 | Int: 14.1±3.8<br>Con: 13.8±5.2<br>$p = 0.63$                                                                                                                                      | Random: Unclear<br>AC: Low<br>Blinding: Unclear<br>Data: High<br>SR: Unclear<br>Other: Unclear    |
| Haakstad <sup>79</sup>   | Oslo, Norway<br>Sep 2007 -<br>Mar 2008      | Singleton pregnancy, < 24 weeks gestation, nulliparous, not in exercise program in the 6 months before pregnancy. Excluded: > 2 miscarriages, heart disease, persistent bleeding after 12 weeks, poorly controlled thyroid disease, HTN, pre-eclampsia. Sample: 105 (52 int, 53 con)<br>Final analyses: 14 int, 53 con | A 12-week program of 60 mins supervised dance classes, at least twice a week. Women advised to participate in moderate PA of on remaining days. Duration: 12 weeks                                                                             | Int: 11.0±2.0<br>Con: 13.8± 4.0<br>$p = 0.01$<br>GWG: Pre-pregnancy– 36 weeks                                                                                                     | Random: Low<br>AC: Unclear<br>Blinding: Low<br>Data: Low<br>SR: Unclear<br>Other: Low             |
| Kong <sup>81</sup>       | Iowa, United States                         | Singleton pregnancy, 18-45 years, overweight or obese, < 3, 30 min sessions of PA 6 months before enrolment. Excluded: History of chronic disease such as CVD, thyroid disease, prior GDM, smoking. Sample: 42 (19 int, 23 con)<br>Final analyses: 18 int, 19 con                                                      | An unsupervised walking program consisting of a safety training session regarding 30 mins of leisure activity according to guidelines. Women were given a treadmill for intervention and encouraged to walk in any setting. Duration: 22 weeks | Overweight int: 10.5±5.4<br>Overweight con: 9.9±6.1<br><i>Not significant</i><br>Obese int: 12.1±9.0<br>Obese con: 12.5±8.5<br><i>Not significant</i><br>GWG: Baseline – 36 weeks | Random: Low<br>AC: Low<br>Blinding: Low<br>Data: Low<br>SR: Unclear<br>Other: Low                 |
| Nascimento <sup>80</sup> | Sao Paulo, Brazil<br>Aug 2008-<br>Mar 2010  | Singleton pregnancy, ≥18 years, 14-24 weeks gestation, BMI ≥26kg/m <sup>2</sup> . Excluded: multiple gestations, contraindications to exercise. Sample: 82 (40 int, 42 con)<br>Final analyses: 39 int, 41 con                                                                                                          | A weekly group exercise class consisting of stretching, upper and lower limb strengthening and relaxation. Women were encouraged to walk 5 days per week. Duration: 20 weeks                                                                   | Int: 10.3±5.0<br>Con: 11.5±7.4<br>$p = 0.54$<br>GWG: Pre-pregnancy - 38/39 weeks                                                                                                  | Random: Low<br>AC: Unclear<br>Blinding: Unclear<br>Data: Low<br>SR: Unclear<br>Other: Unclear     |
| Nobles <sup>35</sup>     | Massachusetts, United States<br>2007 – 2012 | High risk of GDM<br>Excluded: Already physically active, <18 years and >40 years, >20 weeks, unable to read English. Sample: 290 (143 PA, 147 H&W)<br>Final analyses: 118 PA, 123 H&W                                                                                                                                  | PA: Face-to-face counselling at baseline, followed by weekly and bi-weekly phone calls with tailored PA advice<br>H&W: Mailings of brochures related to general pregnancy health and wellbeing. Duration: 12 weeks                             | PA: 12.9±8.3<br>H&W: 13.8±9.0<br>$p = 0.39$<br>GWG: Pre-pregnancy - delivery                                                                                                      | Random: Unclear<br>AC: Unclear<br>Blinding: Unclear<br>Data: Low<br>SR: Unclear<br>Other: Unclear |

|                                |                                                    |                                                                                                                                                                                                                                                                                             |                                                                                                                                                                                                |                                                                                                              |                                                                                                    |
|--------------------------------|----------------------------------------------------|---------------------------------------------------------------------------------------------------------------------------------------------------------------------------------------------------------------------------------------------------------------------------------------------|------------------------------------------------------------------------------------------------------------------------------------------------------------------------------------------------|--------------------------------------------------------------------------------------------------------------|----------------------------------------------------------------------------------------------------|
| Oostdam <sup>85</sup>          | Amsterdam<br>Netherlands<br>Jan 2007 -<br>Jan 2011 | Singleton pregnancy, overweight or obese with previous GDM, macrosomia or first-grade relative with T2DM.<br>Excluded: > 20 weeks gestation, < 18 years, GDM, HTN, alcohol or drug use, other health complications.<br>Sample: 121 (62 int, 59 con)<br>Final analyses (ITT): 40 int, 45 con | 2 x 60 minute PA sessions with aerobic and strength exercises supervised by a physiotherapist at participating hospital.<br>Duration: 25 weeks (women also followed up 12 weeks post-partum).  | Int: 6.2±5.0 <sup>c</sup><br>Con: 5.6±3.5 <sup>c</sup><br><i>Not significant</i><br>GWG: Baseline - 32 weeks | Random: Low<br>AC: Low<br>Blinding: Unclear<br>Data: Unclear<br>SR: Low<br>Other: Low              |
| Perales <sup>45</sup>          | Madrid, Spain<br>Oct 2009 -<br>Jan 2013            | Singleton pregnancy, overweight or obese.<br>Excluded: Obstetric complications.<br>Sample: 129 (65 int, 64 con)<br>Final analyses: 52 int, 54 con                                                                                                                                           | Group exercise program, 55-60 mins, three times per week. Warm up, core aerobic activities, and cool down.<br>Duration: 30 weeks                                                               | Int: 46.8% <sup>d</sup><br>Con: 67.3% <sup>d</sup><br>$p = 0.03$<br>GWG: Pre-pregnancy - delivery.           | Random: Low<br>AC: Unclear<br>Blinding: Unclear<br>Data: Low<br>SR: low<br>Other: Unclear          |
| Rodriguez-Blaque <sup>92</sup> | Granada, Spain<br>Mar 2016 – Apr 2016              | Singleton pregnancy, 12-20 weeks.<br>Excluded: Contraindications to PA<br>Sample: 140 (70 int, 70 con)<br>Final analyses: 65 int, 65 con                                                                                                                                                    | Aquatic PA sessions, 60 mins, 3 days/week.<br>Duration: 17 weeks                                                                                                                               | Int: 8.3±2.8<br>Con: 11.2±3.5<br>$p < 0.01$<br>GWG: 12 – 36 weeks                                            | Random: Low<br>AC: Unclear<br>Blinding: Unclear<br>Data: Unclear<br>SR: Unclear<br>Other: Unclear  |
| Ronnberg <sup>83</sup>         | Örebro, Sweden<br>Jun 2007 -<br>Mar 2010           | Singleton pregnancy, ≥18 years old, <16 weeks gestation.<br>Excluded: BMI <19kg/m <sup>2</sup> , history of an eating disorder, obstetric complications, IUGR, chronic illness.<br>Sample: 445 (221 int 224 con)<br>Final analyses: 192 int, 182 con                                        | Individual education session regarding IOM GWG guidelines and PA prescription issued by a midwife. Weight gain monitored on chart.<br>Duration: 30 weeks                                       | Int: 14.2±4.5<br>Con: 15.3±5.4<br>$p = 0.029$<br>GWG: First pre-natal visit - delivery                       | Random: Unclear<br>AC: Unclear<br>Blinding: Unclear<br>Data: High<br>SR: Unclear<br>Other: Unclear |
| Ruiz <sup>75</sup>             | Madrid, Spain<br>Sep 2007 -<br>Jan 2011            | Singleton pregnancy, sedentary, not at risk of preterm delivery.<br>Excluded: Contraindication to exercise<br>Sample: 962 (481 int, 481 con)<br>Final analyses: 481 int, 481 con                                                                                                            | Group exercise classes, 55-60 mins, 3 days per week. Session consisted of a warm-up, core session of moderate intensity aerobic and resistance exercises, and cool-down.<br>Duration: 30 weeks | Int: 11.9±3.8<br>Con: 13.2±4.3<br>$p < 0.01$<br>GWG: First prenatal visit - delivery                         | Random: Low<br>AC: Unclear<br>Blinding: Unclear<br>Data: Low<br>SR: Low<br>Other: Low              |
| Wang <sup>91</sup>             | Peking, China<br>Dec 2014 –<br>Jul 2016            | Singleton pregnancy, >18 years, <12 weeks gestation, BMI > 24, non-smoker.<br>Excluded: Cervical insufficiency, pre-existing chronic disease, metformin, corticosteroids.<br>Sample: 300 (150 int, 150 con)<br>Final analyses: 112 int, 114 con                                             | Supervised cycling program, 30 mins, 3 days per week.<br>Duration: 27 weeks                                                                                                                    | Int: 8.4±3.7<br>Con: 10.5±3.3<br>$p < 0.01$<br>GWG: Baseline - delivery                                      | Random: Low<br>AC: Low<br>Blinding: Unclear<br>Data: Low<br>SR: Unclear<br>Other: Unclear          |

<sup>a</sup> Gestational weight gain (kg): mean (standard deviation) unless otherwise stated.

<sup>b</sup>Based on Cochrane Collaboration Risk of Bias. Random = Randomization; AC = Allocation concealment; Blinding = Blinding of participants, personal and outcome; Data = Incomplete data; SR = Selective reporting; Other = Other bias.

<sup>c</sup>Intention to treat data.

<sup>d</sup>Percentage that experienced excessive GWG according to Institute of Medicine recommendations.

Other acronyms and abbreviations in alphabetical order: BMI = body mass index, Con = control group, CVD = cardiovascular disease, GDM = gestational diabetes mellitus, GWG = gestational weight gain, Hi = high, HTN = hypertension, Int = intervention group, IOM = Institute of Medicine, IUGR = intrauterine growth restriction, Lo = low, PA = Physical Activity, T2DM = type 2 diabetes mellitus.
