# Supplementary material for: Attenuating Pregnancy Weight Gain—What Works and Why: A Systematic Review and Meta-Analysis
Source: MDPI journal article supplement (doi:10.3390/nu10070944), 2018-07-22
Supplement: s1 [file s1]

**Table S7:** Description of ‘other’ interventions aimed at preventing excessive gestational weight gain (other than diet, physical activity, lifestyle and eHealth).

| First author                     | Setting and date                                   | Population                                                                                                                                                                                                                                                      | Intervention                                                                                                                                                                                                                                                           | GWG <sup>a</sup> and GWG measure                                                                                                                                                                        | Quality <sup>b</sup>                                                                          |
|----------------------------------|----------------------------------------------------|-----------------------------------------------------------------------------------------------------------------------------------------------------------------------------------------------------------------------------------------------------------------|------------------------------------------------------------------------------------------------------------------------------------------------------------------------------------------------------------------------------------------------------------------------|---------------------------------------------------------------------------------------------------------------------------------------------------------------------------------------------------------|-----------------------------------------------------------------------------------------------|
| Bechtel-Blackwell <sup>127</sup> | United States                                      | African American, 13-18 years old, primiparous.<br>Sample: 60 (30 int, 30 con)<br>Final analyses: 22 int, 24 con                                                                                                                                                | Three, 20 minute group sessions regarding nutrition needs specific to stage of pregnancy and nutrition assessment using computer assisted self-interviewing.<br>Duration: 22-24 weeks                                                                                  | Trimester 1: Int:1.5 ; Con:2.8 <sup>c</sup><br>$p < 0.01$<br>Trimester 2: Int:6.6; Con:6.8 <sup>c</sup><br>$p > 0.05$<br>Trimester 3: Int:6.9; Con:5.6 <sup>c</sup><br>$p < 0.01$<br>GWG: Per trimester | Random: High<br>AC: High<br>Blinding: Unclear<br>Data: High<br>SR: Unclear<br>Other: Unclear  |
| Brownfoot <sup>30</sup>          | Melbourne, Australia<br>Jan 2010 – Nov 2012        | Singleton pregnancy, < 21 weeks gestation, antenatal care through hospital clinic.<br>Excluded: <18 years, >45 years, medical comorbidities, substance abuse, inability to speak English.<br>Sample: 782 (386 int, 396 con)<br>Final analyses: 369 int, 372 con | Women were weighed at each antenatal visit. All clinic rooms had the IOM guidelines displayed and clinicians were encouraged to discuss appropriate GWG with patients.<br>Duration: 22 weeks                                                                           | Int: 0.54±0.28 <sup>d</sup><br>Con: 0.53±0.24 <sup>d</sup><br>$p = 0.63$<br>GWG: Baseline - final visit                                                                                                 | Random: Unclear<br>AC: Low<br>Blinding: Unclear<br>Data: Low<br>SR: Low<br>Other: Low         |
| Daley <sup>122</sup>             | United Kingdom<br>Apr 2012 – Dec 2012              | Singleton pregnancy, > 18 years old, BMI 18-29.9kg/m <sup>2</sup> .<br>Excluded: Obesity, pregnancy complications.<br>Sample: 76 (40 int, 36 con)<br>Final analyses: 34 int, 34 con                                                                             | A midwife-led intervention as part of usual antenatal care. Women were weighed at each appointment and weights were plotted on GWG chart. Women were also given a weight record chart and asked to monitor their own progress between visits.<br>Duration: 26-28 weeks | Int: 12.0±4.5<br>Con: 12.1±5.9<br><i>Significance not reported</i><br>GWG: Baseline - 38 weeks                                                                                                          | Random: Unclear<br>AC: Unclear<br>Blinding: Unclear<br>Data: Low<br>SR: Unclear<br>Other: Low |
| Herrera-Perdigon <sup>126</sup>  | Philadelphia, United States<br>Jan 1992 - Jan 1996 | High-risk pregnancy (Pre-GDM, GDM, HTN).<br>Excluded: < 18 years, risk of pre-term labour, multiple pregnancy.<br>Sample: 77<br>Final analyses: 29 int, 38 con                                                                                                  | Usual physician-led care was modified to so half prenatal visits were with a nurse at home. Visits with physician or nurse were every 1-2 weeks. Advice regarding nutrition and lifestyle provided.<br>Duration: 17 weeks                                              | Int: 11.8±8.5<br>Con: 14.2±10.3<br>$p = 0.91$<br>GWG: Pre-pregnancy - delivery                                                                                                                          | Random: Unclear<br>AC: Low<br>Blinding: Unclear<br>Data: Low<br>SR: Unclear<br>Other: Unclear |
| Jeffries <sup>123</sup>          | Melbourne, Australia<br>Jul 2007 – May 2008        | Singleton pregnancy, 18-45 years old.<br>Excluded: pre-existing diabetes, non-English speaking<br>Sample: 286 (148 int, 138 con)<br>Final analyses: 125 int, 138 con                                                                                            | Education regarding GWG guidelines.<br>Women’s weights were recorded at 16, 20, 24, 28, 30, 32 and 34 weeks.<br>Duration: 25 weeks                                                                                                                                     | Int: 10.7±4.2<br>Con: 11.5±4.0<br>$p = 0.42$<br>GWG: Baseline - 36 weeks                                                                                                                                | Random: Low<br>AC: Low<br>Blinding: Unclear<br>Data: Low<br>SR: Unclear<br>Other: Low         |

|                           |                                               |                                                                                                                                                                                                                                                                                                                                        |                                                                                                                                                                                                                                                                                                        |                                                                                                                    |                                                                                               |
|---------------------------|-----------------------------------------------|----------------------------------------------------------------------------------------------------------------------------------------------------------------------------------------------------------------------------------------------------------------------------------------------------------------------------------------|--------------------------------------------------------------------------------------------------------------------------------------------------------------------------------------------------------------------------------------------------------------------------------------------------------|--------------------------------------------------------------------------------------------------------------------|-----------------------------------------------------------------------------------------------|
| Quinlivan <sup>124</sup>  | Melbourne, Australia                          | Singleton pregnancy, overweight or obese. Excluded: foetal abnormalities, wanted to relinquish infant after birth, unable to attend clinic, non-English speaking. Sample: 132 (67 int, 65 con) Final analyses: 63 int, 61 con                                                                                                          | An intervention with four key aspects: a) Continuity of care, b) Assessing weight gain at each antenatal visit, c) Dietary intervention by a food technologist at each antenatal visit, d) Psychological assessment and intervention if indicated Duration: 30 weeks                                   | Int: 7.0±5.2<br>Con: 13.8±5.2<br>$p < 0.01$<br>GWG: Baseline - delivery                                            | Random: Low<br>AC: Low<br>Blinding: Unclear<br>Data: Unclear<br>SR: Unclear<br>Other: Unclear |
| Santamaria <sup>125</sup> | Italy<br>Jan 2012 – Jul 2013                  | Singleton pregnancy, pre-pregnancy BMI >25 and <30, first trimester fasting plasma glucose <126mg/dl and or random glycaemia <200mg/dl, Caucasian. Excluded: Previous GDM, pre-GDM, corticosteroids. Sample: 220 (110 int, 110 con) Final analyses: 95 int, 102 con                                                                    | 2g myo-inositol + 200ug folic acid twice/day. Duration: 12 weeks                                                                                                                                                                                                                                       | Int: 6.2±3.2<br>Con: 7.5±4.0<br>$p = 0.07$<br>GWG: Baseline – Oral glucose tolerance test.                         | Random: Low<br>AC: Low<br>Blinding: Unclear<br>Data: Low<br>SR: Unclear<br>Other: Unclear     |
| Syngelaki <sup>29</sup>   | London, United Kingdom<br>Oct 2010 – Jun 2013 | Singleton pregnancy, 12-18 weeks gestation, BMI >35kg/m <sup>2</sup> . Excluded: <18 years old, major foetal defect detected, history of GDM, kidney, heart or liver failure, hyperemesis gravidarum, prescribed metformin before screening, sensitivity to metformin. Sample: 450 (225 int, 225 con) Final analysis: 202 int, 198 con | Metformin was initiated at an initial dose of 1g per day and increased 0.5g per week to a maximum dose of 3g per day in week five. Both control and intervention groups received advice regarding healthy eating and low-GI foods, and were encouraged to exercise 30 mins per day. Duration: 25 weeks | Int: 4.6 (1.3-7.2) <sup>e</sup><br>Con: 6.3 (2.9-9.2) <sup>e</sup><br>$p < 0.001$<br>GWG: Randomization - delivery | Random: Low<br>AC: Low<br>Blinding: Low<br>Data: Unclear<br>SR: Unclear<br>Other: Unclear     |

<sup>a</sup>Gestational weight gain (kg): mean (standard deviation) unless otherwise stated.

<sup>b</sup>Based on Cochrane Collaboration Risk of Bias. Random = Randomization; AC = Allocation concealment; Blinding = Blinding of participants, personal and outcome; Data = Incomplete data; SR = Selective reporting; Other = Other bias.

<sup>c</sup>GWG per trimester (SD not reported).

<sup>d</sup>Weekly rate of GWG (kg/week).

<sup>e</sup>GWG (kg) median and interquartile range.

Other acronyms and abbreviations in alphabetical order: BMI = body mass index, Con = control group, GI = glycemic index, GWG = gestational weight gain, HTN = hypertension, Int = intervention group, IOM = Institute of Medicine, NR = Not reported, PA = Physical Activity.
