# Supplementary material for: Attenuating Pregnancy Weight Gain—What Works and Why: A Systematic Review and Meta-Analysis
Source: MDPI journal article supplement (doi:10.3390/nu10070944), 2018-07-22
Supplement: s1 [file s1]

**Table S5:** Description of lifestyle interventions aimed at preventing excessive gestational weight gain.

| First author             | Setting and date                                   | Population                                                                                                                                                                                                                                 | Intervention                                                                                                                                                                                                                                                                                                                    | GWG <sup>a</sup> and GWG measure                                                                       | Quality <sup>b</sup>                                                                              |
|--------------------------|----------------------------------------------------|--------------------------------------------------------------------------------------------------------------------------------------------------------------------------------------------------------------------------------------------|---------------------------------------------------------------------------------------------------------------------------------------------------------------------------------------------------------------------------------------------------------------------------------------------------------------------------------|--------------------------------------------------------------------------------------------------------|---------------------------------------------------------------------------------------------------|
| Althuisen <sup>111</sup> | Netherlands<br>Feb 2005 –<br>May 2006              | Singleton pregnancy, < 14 weeks gestation, nulliparous, literate in Dutch.<br>Sample: 246 (123 int, 123 con)<br>Final analyses (GWG only):106 int, 113 con                                                                                 | Four face-to-face counselling sessions regarding weight, PA and diet (8, 22, 30 and 36 weeks).<br>Duration: 30 weeks (including 8 weeks post-partum)                                                                                                                                                                            | Int: 11.6±4.1<br>Con: 11.1±3.2<br><i>Not significant</i><br>GWG: 15 – 35 weeks                         | Random: Low<br>AC: Unclear<br>Blinding: Unclear<br>Data: Low<br>SR: High<br>Other: Unclear        |
| Asbee <sup>97</sup>      | Charlotte, United States<br>Oct 2005 –<br>Apr 2007 | Singleton pregnancy, 18-49 years, prenatal care established at 6-16 weeks gestation, English or Spanish speaking.<br>Excluded: BMI > 40, pre-existing medical conditions.<br>Sample: 144 randomized<br>Final analyses: 57 int, 43 con      | Counselling session regarding diet, PA and GWG at baseline. Recommended energy 40% CHO, 30% protein, 30% fat, and 3-5 moderate PA sessions per week. Women weighed at routine appointments and given further advice if not meeting guidelines.<br>Duration: 26 weeks                                                            | Int: 12.6±5.7<br>Con: 16.2±7.0<br><i>p</i> = 0.01<br>GWG: Pre- pregnancy - delivery                    | Random: Low<br>AC: Low<br>Blinding: Unclear<br>Data: High<br>SR: Unclear<br>Other: Unclear        |
| Asci <sup>98</sup>       | Istanbul, Turkey<br>Jun 2011 –<br>Jul 2012         | Singleton pregnancy, > 18 years old, < 12 weeks gestation, no intention to lose weight during pregnancy.<br>Sample: 102 (51 int, 51 con)<br>Final analyses: 45 int, 45 con                                                                 | One hour interviews regarding: GWG (weeks 12-15), PA (weeks 16-18), nutrition (weeks 20-24) and weight (week 37). Women given GWG card at baseline and weight was taken at each meeting.<br>Duration: 25 weeks                                                                                                                  | Int: 12.5±5.0<br>Con: 12.3±4.8<br><i>p</i> = 0.87<br>GWG: Pre-pregnancy – 37 weeks                     | Random: Low<br>AC: Unclear<br>Blinding: Unclear<br>Data: Unclear<br>SR: Unclear<br>Other: Unclear |
| Bogaerts <sup>104</sup>  | Flanders, Belgium<br>Mar 2008 –<br>Apr 2011        | Singleton pregnancy, < 15 weeks gestation, obese, literate in Dutch.<br>Excluded: Type 1 diabetes, primary need for nutrition advice.<br>Sample: 205 (64 brochure, 78 LS, 63 con)<br>Final analyses: 58 brochure, 76 LS, 63 con            | Brochure: A purpose-designed brochure regarding diet, PA and limiting excessive GWG.<br>LS: Four 1 ½ - 2 hour group sessions regarding energy intake. Recommended energy 50-55% CHO, 9-11% protein, 30-35% fat. Motivational interviewing, food diaries and label reading used (in addition to brochure).<br>Duration: 25 weeks | Brochure: 9.5±6.8<br>LS: 10.6±7.0<br>Con: 13.5±7.3<br><i>p</i> < 0.01<br>GWG: Pre-pregnancy - delivery | Random: Low<br>AC: Low<br>Blinding: Unclear<br>Data: Low<br>SR: Unclear<br>Other: Low             |
| Bruno <sup>116</sup>     | Modena, Italy<br>Feb 2013 –<br>Jun 2014            | Singleton pregnancy, > 18 years, BMI > 25.<br>Excluded: Chronic disease, medications that affect weight, bariatric surgery, previous GDM, contraindications to exercise.<br>Sample: 191 (96 int, 95 con)<br>Final analyses: 69 int, 62 con | One hour counselling session with dietitian at enrolment with tailored dietary advice. PA advice was to participate in 30 mins PA 3 days per week.<br>Duration: 30 weeks                                                                                                                                                        | Int:9.5±6.4<br>Con: 9.1±6.7<br><i>p</i> = 0.75<br>GWG: Baseline – 36 weeks                             | Random: Low<br>AC: Low<br>Blinding: Unclear<br>Data: Unclear<br>SR: Low<br>Other: Low             |
| Cahill <sup>39</sup>     | Missouri, United States<br>Oct 2012 –<br>Mar 2016  | African American ancestry, singleton pregnancy, 18-45 years, <15 weeks, BMI 25-45, disadvantaged socioeconomic status                                                                                                                      | PAT: One-on-one home visits with parent educators every 2 weeks. Focus on development-centred parenting support and education.                                                                                                                                                                                                  | PAT: 9.9±5.3<br>PAT+: 8.1±5.6<br><i>p</i> = 0.01<br>GWG: 15 – 35 weeks                                 | Random: Low<br>AC: Unclear<br>Blinding: Unclear<br>Data: Low                                      |

|                         |                                                     |                                                                                                                                                                                                                                                                              |                                                                                                                                                                                                                                         |                                                                                                                   |                                                                                               |
|-------------------------|-----------------------------------------------------|------------------------------------------------------------------------------------------------------------------------------------------------------------------------------------------------------------------------------------------------------------------------------|-----------------------------------------------------------------------------------------------------------------------------------------------------------------------------------------------------------------------------------------|-------------------------------------------------------------------------------------------------------------------|-----------------------------------------------------------------------------------------------|
|                         |                                                     | Excluded: Diabetes, history of GDM or macrosomia, contraindications to exercise, substance abuse, non-English speaking.<br>Sample: 267 (134 PAT, 133 PAT+)<br>Final analyses: 121 PAT, 119 PATE+                                                                             | PAT+: PAT curriculum plus lifestyle curriculum based on cognitive behaviour therapy to achieve optimal GWG.<br>Duration: 20 weeks                                                                                                       |                                                                                                                   | SR: Unclear<br>Other Unclear                                                                  |
| Dodd <sup>112</sup>     | Adelaide, Australia<br>Jun 2008 – Dec 2011          | Singleton pregnancy, 10 – 20 weeks gestation, overweight or obese.<br>Excluded: Pre-existing diabetes<br>Sample: 2212 (1108 int, 1104 con)<br>Final analyses: 1080 int, 1072 con                                                                                             | Three face-to face meetings and three phone calls consisting of dietary and LS advice. Women were provided with meal plans, recipes and snack ideas.<br>Duration: 22 weeks                                                              | Overall:<br>Int: 9.4±5.7<br>Con: 9.4±5.8<br>$p = 0.89$                                                            | Random: Low<br>AC: Low<br>Blinding: Low<br>Data: Unclear<br>SR: Low<br>Other: Low             |
| Gesell <sup>108</sup>   | Nashville, United States<br>Jan 2011 – Apr 2011     | Singleton pregnancy, > 16 years old, 10 – 28 weeks gestation, literate in English or Spanish<br>Sample: 135 (68 int, 67 con)<br>Final analyses: 38 int, 36 con                                                                                                               | 12 weekly, 90 min group sessions based on social learning theory. Topics included nutrition PA, sleep, weight monitoring, goal setting, cooking skills, money management and anxiety.<br>Duration: 12 weeks                             | Int: 8.9±5.6<br>Con: 10.2±7.1<br>$p = 0.37$<br>GWG: Pre-pregnancy - delivery                                      | Random: Low<br>AC: Low<br>Blinding: Unclear<br>Data: Low<br>SR: Unclear<br>Other: Low         |
| Guelinckx <sup>99</sup> | Leuven, Belgium<br>Mar 2006 – Jan 2008              | Singleton pregnancy, > 15 weeks gestation, obese, literate in Dutch.<br>Excluded: Pre-existing diabetes, GDM, metabolic disorders, Chrons disease, allergies, preterm birth.<br>Sample: 195 (65 passive, 65 active, 65 con)<br>Final analyses: 37 passive, 42 active, 43 con | Passive: A brochure regarding diet, PA and GWG.<br>Active: Three 1-hour group sessions.<br>Recommended energy 55% CHO, 9-11% protein, 30-35% fat.<br>Participants advised on label reading, PA, emotional eating.<br>Duration: 25 weeks | Passive: 10.9 ±5.6<br>Active: 9.8±7.6<br>Con: 10.6±6.9<br><i>Not significant</i><br>GWG: Pre-pregnancy - delivery | Random: Unclear<br>AC: Unclear<br>Blinding: Unclear<br>Data: Low<br>SR: Unclear<br>Other: Low |
| Harrison <sup>105</sup> | Melbourne, Australia                                | Singleton pregnancy, 12 – 15 weeks gestation, overweight or obese, high risk of GDM.<br>Excluded: Diabetes, pre-existing medical conditions, BMI > 45.<br>Sample: 228 (121 int, 107 con)<br>Final analyses: 106 int, 97 con                                                  | Four individual behaviour change sessions based on social cognitive theory.<br>Recommendations made for diet, PA, goal setting and self-monitoring.<br>Duration: 14 weeks                                                               | Int: 6.0±2.8<br>Con: 6.9±3.3<br>$p = 0.05$<br>GWG: Randomization - 28 weeks                                       | Random: Low<br>AC: Low<br>Blinding: Unclear<br>Data: Low<br>SR: Unclear<br>Other: Low         |
| Hawkins <sup>106</sup>  | Massachusetts, United States<br>Apr 2010 – Aug 2011 | Singleton pregnancy, 18 – 40 years old, < 18 weeks gestation, overweight or obese, < 30 minutes PA per week.<br>Excluded: Type 2 diabetes, heart or renal disease, contraindications to moderate PA.<br>Sample: 68 (33 int, 35 con)<br>Final analyses: 32 int, 34 con        | 6 face-to-face counselling sessions with 5 phone calls regarding diet and PA.<br>Duration: 20-26 weeks                                                                                                                                  | Int: 17.7±1.0<br>Con: 17.9±0.1<br>$p = 0.89$<br>GWG: Pre-pregnancy - delivery                                     | Random: Unclear<br>AC: Unclear<br>Blinding: Unclear<br>Data: Low<br>SR: Unclear<br>Other: Low |

|                       |                                              |                                                                                                                                                                                                                                                          |                                                                                                                                                                                                                                                           |                                                                                                                                                                                               |                                                                                               |
|-----------------------|----------------------------------------------|----------------------------------------------------------------------------------------------------------------------------------------------------------------------------------------------------------------------------------------------------------|-----------------------------------------------------------------------------------------------------------------------------------------------------------------------------------------------------------------------------------------------------------|-----------------------------------------------------------------------------------------------------------------------------------------------------------------------------------------------|-----------------------------------------------------------------------------------------------|
| Huang <sup>100</sup>  | Taiwan<br>Jan 2006 –<br>Jun 2006             | Singleton pregnancy, >18 years old, <16 weeks gestation, literate in Chinese.<br>Excluded: Cognitive impairment, psychiatric illness.<br>Sample: 240 (80 int 1, 80 int 2, 80 con)<br>Final analyses: 61 int 1, 64 int 2, 64 con                          | Int 1: 6 x one-to-one counselling sessions regarding diet and PA.<br>Int 2: Educational session 24-28 hours post-partum and 2 x one-to-one booster sessions at 6 and 12 weeks post-partum.<br>Duration: 24 weeks of pregnancy (post-partum not included). | Int 1: 14.0±2.4<br>Con: 16.2±3.3<br>$p < 0.01$                                                                                                                                                | Random: Low<br>AC: Unclear<br>Blinding: Unclear<br>Data: Unclear<br>SR: Unclear<br>Other: Low |
| Hui <sup>101</sup>    | Manitoba, Canada<br>Jul 2004 –<br>Feb 2010   | Singleton pregnancy, < 26 weeks gestation.<br>Excluded: diabetes, contraindications to PA.<br>Sample: 224 (112 int, 112 con)<br>Final analyses: 102 int, 88 con                                                                                          | LS advice regarding PA and diet. Group PA sessions at local gym 3-5 times per week. 2 x dietary and GWG counselling sessions provided at enrolment and 2 months after enrolment.<br>Duration: 10-16 weeks                                                 | Int: 14.1±6.0<br>Con: 15.2±5.9<br>$p = 0.28$<br>GWG: Pre-pregnancy - delivery<br>delivery                                                                                                     | Random: Low<br>AC: Low<br>Blinding: Unclear<br>Data: Low<br>SR: Unclear<br>Other: Low         |
| Hui <sup>102</sup>    | Manitoba, Canada<br>May 2009 –<br>Dec 2011   | Singleton pregnancy, < 20 weeks gestation.<br>Excluded: diabetes, contraindications to PA<br>Sample: 113 (57 int, 56 con)<br>Final analyses: 57 int, 56 con                                                                                              | LS advice regarding PA and diet. Group PA sessions 3-5 times per week. 2 x dietary and GWG counselling sessions provided at enrolment and 2 months after enrolment.<br>Duration: 27 weeks                                                                 | Healthy weight int: 12.9±3.7<br>Healthy weight con: 16.2±4.4<br>$p = 0.03$<br>Overweight/obese int: 15.2±7.5<br>Overweight/obese con: 14.4±7.1<br>$p = 0.26$<br>GWG: Pre-pregnancy – delivery | Random: Low<br>AC: Low<br>Blinding: Unclear<br>Data: Low<br>SR: Unclear<br>Other: Low         |
| Jing <sup>114</sup>   | Chengdu, China<br>Sep 2012 –<br>Sep 2013     | Singleton pregnancy, > 18 years.<br>Excluded: diabetes, pregnancy complications.<br>Sample: 262 (131 int, 131 con)<br>Final analyses: 115 int, 106 con                                                                                                   | One 20 min health education session regarding GWG and GDM. Manuals were given regarding diet PA. Participants could contact a trained graduate to ask questions and receive feedback at 16-20 weeks and 20-24 weeks.<br>Duration: 12 weeks                | Int: 9.2±4.0<br>Con: 9.7±3.9<br>$p = 0.40$<br>GWG: Baseline – 24 weeks                                                                                                                        | Random: Low<br>AC: Unclear<br>Blinding: Unclear<br>Data: Low<br>SR: Unclear<br>Other: Unclear |
| Luoto <sup>115</sup>  | Pirkanmaa, Finland<br>Oct 2007 –<br>Dec 2008 | Singleton pregnancy, at least one risk factor for GDM.<br>Excluded: Abnormal baseline OGTT, pre-pregnancy diabetes, contraindications to PA, substance abuse, psychiatric illness.<br>Sample: 446 (246 int, 196 con)<br>Final analyses: 216 int, 179 con | LS advice regarding PA and diet in regular antenatal visits. PA counselling focused on increasing leisure time. Diet counselling based on the Finnish dietary recommendations.<br>Duration: 29 weeks                                                      | Int: 13.8±5.8<br>Con: 14.2±5.1<br>$p = 0.52$<br>GWG: Pre-pregnancy - delivery                                                                                                                 | Random: Low<br>AC: Unclear<br>Blinding: Unclear<br>Data: Unclear<br>SR: Low<br>Other: Low     |
| Pawalia <sup>40</sup> | Hisar, India<br>Jun 2016 –<br>Sep 2017       | Singleton pregnancy, >18 years, <16 weeks, BMI > 18.5, mobile phone.<br>Excluded: Declared unfit by obstetrician.<br>Sample: 36 (12 PA, 12 PA+Diet, 12 con)<br>Final analyses: NR                                                                        | PA: 60-min hospital-based exercise sessions, 2 days per week. Women encouraged to walk 4 days/week.<br>PA+Diet: PA intervention plus regular text messages about nutrition.<br>Duration: 27 weeks                                                         | PA: 12.4±3.9<br>PA+Diet: 12.9±3.7<br>Con: 13.3±5.3<br><i>Significance not reported</i><br>GWG: Pre-pregnancy – delivery                                                                       | Random: High<br>AC: Unclear<br>Blinding: Unclear<br>Data: High<br>SR: High<br>Other: High     |

|                        |                                            |                                                                                                                                                                                                                                                                                            |                                                                                                                                                                                                                                                                            |                                                                                                                                                                                                                                           |                                                                                               |
|------------------------|--------------------------------------------|--------------------------------------------------------------------------------------------------------------------------------------------------------------------------------------------------------------------------------------------------------------------------------------------|----------------------------------------------------------------------------------------------------------------------------------------------------------------------------------------------------------------------------------------------------------------------------|-------------------------------------------------------------------------------------------------------------------------------------------------------------------------------------------------------------------------------------------|-----------------------------------------------------------------------------------------------|
| Petrella <sup>93</sup> | Modena, Italy<br>Apr 2011 – Oct 2011       | Singleton pregnancy, > 18 years old, overweight or obese.<br>Excluded: chronic diseases, previous GDM, smokers, bariatric surgery, regular PA, supplements known to affect body weight.<br>Sample: 63 (33 int, 30 con)<br>Final analyses: 33 int, 28 con                                   | A one-hour counselling session regarding an energy restricted diet: 1500kcal/day + 200 kcal/day for obese or 300kcal/day overweight. Women were also encouraged to exercise 30 minutes, 3 days per week.<br>Duration: 27 weeks                                             | Int: 8.8±6.5<br>Con: 10.4±5.0<br><i>Not significant</i><br>GWG: Pre-pregnancy - delivery                                                                                                                                                  | Random: Low<br>AC: Low<br>Blinding: Unclear<br>Data: Unclear<br>SR: Unclear<br>Other: Low     |
| Phelan <sup>94</sup>   | Rhode Island, United States<br>2006 - 2008 | Singleton pregnancy, > 18 years old, 10-16 weeks gestation, BMI 19.8 - 40kg/m <sup>2</sup> , non-smoker.<br>Excluded: major health or psychiatric disease, weight-loss during pregnancy, history of ≥3 miscarriages.<br>Sample: 401 (201 int, 200 con)<br>Final analyses: 174 int, 169 con | One session regarding GWG, PA and energy intake (20kcal/kg/day). Emphasis placed on self-monitoring. Food diaries, scales and pedometer provided and women received supportive phone calls throughout pregnancy.<br>Duration: 27 weeks                                     | Healthy weight int: 15.3±4.4<br>Healthy weight con: 16.2±4.6<br><i>Significance not reported</i><br>Overweight/obese int: 14.7±6.9<br>Overweight/obese con: 15.1±7.5<br><i>Significance not reported</i><br>GWG: Pre-pregnancy – delivery | Random: Low<br>AC: Low<br>Blinding: Unclear<br>Data: Low<br>SR: Unclear<br>Other: Low         |
| Phelan <sup>41</sup>   | United States<br>Nov 2012 – Oct 2015       | Singleton pregnancy, 6-16 weeks, > 18 years, BMI > 25, English or Spanish speaking<br>Excluded: HbA1c > 6.5, self-reported health issues, contraindication to exercise.<br>Sample: 264 (132 int, 132 EUC)<br>Final analyses: 129 int, 127 EUC.                                             | Int: Face-to-face counselling, 20 mins, every two weeks or monthly. If not meeting GWG target, further counselling received.<br>EUC: Enhanced usual care received a 20 min welcome visit and newsletters about health-related topics every 2 months.<br>Duration: 27 weeks | Int: 9.4±6.9<br>EUC: 11.2±7.0<br><i>p</i> = 0.03<br>GWG: Pre-pregnancy – delivery                                                                                                                                                         | Random: Low<br>AC: Unclear<br>Blinding: Unclear<br>Data: Low<br>SR: Low<br>Other: Unclear     |
| Polley <sup>95</sup>   | Pittsburgh, United States                  | Singleton pregnancy, >18 years of age, < 20 weeks gestation.<br>Excluded: underweight, high risk pregnancy.<br>Sample: 120 (61 int, 59 con)<br>Final analyses: 57 int, 53 con                                                                                                              | Lifestyle advice offered at regular clinic visits regarding GWG, PA and diet. Between each visit women were mailed newsletters and contacted by phone. Women with excessive GWG were provided with extra counselling.<br>Duration: 24 weeks                                | Healthy weight int: 15.4±7.1<br>Healthy weight con: 16.4±4.8<br><i>Not significant</i><br>Overweight/obese int: 13.6±7.2<br>Overweight/obese con: 10.1±6.2<br><i>p</i> < 0.01<br>GWG: Pre-pregnancy - delivery                            | Random: Unclear<br>AC: Unclear<br>Blinding: Unclear<br>Data: Low<br>SR: Unclear<br>Other: Low |
| Poston <sup>96</sup>   | United Kingdom                             | Singleton pregnancy, > 16 years, 15 – 18 weeks gestation, obese.<br>Excluded: Underlying disorders or prescribed metformin.<br>Sample: 1555 (783 int, 772 con)<br>Final analysis: 629 int, 651 con                                                                                         | Women received advice on self-monitoring, problem solving, barriers to behaviour change, and enlisting social support. Women set goals regarding PA and diet, received a PA DVD and were encouraged to choose low-GI CHO and reduce saturated fat.<br>Duration: 9 weeks    | Int: 7.2±4.6<br>Con: 7.8±4.6<br><i>p</i> = 0.04<br>GWG: Pre-pregnancy – delivery                                                                                                                                                          | Random: Low<br>AC: Unclear<br>Blinding: Unclear<br>Data: Unclear<br>SR: Low<br>Other: Unclear |

|                             |                                               |                                                                                                                                                                                                                                                                          |                                                                                                                                                                                                                                                                                                    |                                                                                                                                                                                                           |                                                                                                |
|-----------------------------|-----------------------------------------------|--------------------------------------------------------------------------------------------------------------------------------------------------------------------------------------------------------------------------------------------------------------------------|----------------------------------------------------------------------------------------------------------------------------------------------------------------------------------------------------------------------------------------------------------------------------------------------------|-----------------------------------------------------------------------------------------------------------------------------------------------------------------------------------------------------------|------------------------------------------------------------------------------------------------|
| Ramirez-Velez <sup>48</sup> | Cali, Colombia<br>Mar 2008 –<br>Jan 2010      | Nulliparous, 16-30 years, 16-20 weeks gestation, physically inactive.<br>Sample: 67<br>Final analyses: 24 int, 26 con                                                                                                                                                    | Supervised PA session, 60 mins, 3 days per week, individualised nutrition plan and a light breakfast before each PA session.<br>Duration: 12 weeks                                                                                                                                                 | Only reported weight at baseline and end.<br><i>Not significant</i><br>GWG: Baseline – end of intervention                                                                                                | Random: Unclear<br>AC: Unclear<br>Blinding: Unclear<br>Data: Low<br>SR: High<br>Other: Unclear |
| Rauh <sup>107</sup>         | Munich, Germany<br>Feb 2010 –<br>Aug 2011     | Singleton pregnancy, > 18 years old, < 18 weeks gestation, ≤ 1 child.<br>Excluded: contraindications to PA, diabetes, uncontrolled chronic disease that may affect weight gain, psychiatric illness.<br>Sample: 250 (167 int, 83 con)<br>Final analyses: 152 int, 74 con | Two individual counselling sessions (at 20 and 30 weeks) regarding LS, self-monitoring, PA, weight and goal-setting.<br>Duration: 20 weeks                                                                                                                                                         | Int: 14.1±4.1<br>Con: 15.6±5.8<br><i>p</i> = 0.035<br>GWG: Pre-pregnancy - delivery                                                                                                                       | Random: Unclear<br>AC: Unclear<br>Blinding: Unclear<br>Data: Low<br>SR: Unclear<br>Other: Low  |
| Renault <sup>49</sup>       | Copenhagen, Denmark<br>Mar 2009 –<br>Mar 2012 | Singleton pregnancy, > 18 years, < 16 weeks gestation, obese.<br>Excluded: diabetes, serious diseases limiting PA, bariatric surgery, alcohol or drug abuse.<br>Sample: 425 (142 PA + Diet, 142 PA, 141 con)<br>Final analyses: 130 PA + Diet, 125 PA, 134 con           | PA + Diet: PA and diet intervention. Women advised to increase PA to 11,000 steps/day. They also had contact with a dietitian every 2 weeks (alternating between outpatients and phone calls).<br>PA: PA intervention. Women advised to increase PA to 11,000 steps per day.<br>Duration: 26 weeks | PA + Diet: 8.6 (-9.6 - 34.1) <sup>c</sup><br>PA: 9.4 (-3.4 - 28.2) <sup>c</sup><br>Con: 10.9 (-4.4 - 28.7) <sup>c</sup><br><i>p</i> < 0.01 interventions and control.<br>GWG: Pre-pregnancy – 36/37 weeks | Random: Unclear<br>AC: Unclear<br>Blinding: Unclear<br>Data: Low<br>SR: Low<br>Other: Unclear  |
| Ruchat <sup>103</sup>       | Ontario, Canada                               | Singleton pregnancy, > 18 years, 16 – 20 weeks gestation, healthy weight.<br>Excluded: > 40 years, chronic, disease, contraindications to PA.<br>Sample: 94 (23 low, 26 mod, 45 con)<br>Final analyses: 23 low, 26 mod,                                                  | Low: Low intensity PA regimen and modified GDM diet based on 8360kJ/day, 40-55% CHO, 20-30% protein, 30% fat.<br>Mod: Moderate intensity PA regimen with the same dietary advice as low intensity.<br>Duration: 20-24 weeks                                                                        | Low: 15.3±2.9<br>Mod: 14.9±3.8<br>Con: 18.3±5.3<br><i>p</i> < 0.01 interventions and control.<br>GWG: Pre-pregnancy - delivery                                                                            | Random: Unclear<br>AC: Unclear<br>Blinding: Unclear<br>Data: Low<br>SR: Unclear<br>Other: Low  |
| Sagedal <sup>110</sup>      | Norway<br>Sep 2009 -<br>Feb 2013              | Singleton pregnancy, ≤20 weeks gestation, pre-pregnancy BMI ≥19 kg/m <sup>2</sup> , literate in Norwegian or English.<br>Excluded: diabetes, contraindication to PA, substance abuse.<br>Sample: 606 (303 int, 303 con)<br>Final analyses: 296 int, 295 con              | Two phone consultations (baseline and 4 – 6 weeks later). Dietary advice included portion sizes, regular meals, snacking, increasing intake of water, fruits, and vegetables. Women also provided access to a gym, cooking class, and LS booklet.<br>Duration: 24 weeks                            | Int: 14.4±6.2<br>Con: 15.8±5.7<br><i>p</i> < 0.01                                                                                                                                                         | Random: Low<br>AC: Low<br>Blinding: Low<br>Data: Low<br>SR: Low<br>Other: Low                  |

|                          |                                                                                                          |                                                                                                                                                                                                                                                                                                                  |                                                                                                                                                                                                                                                                                                                                             |                                                                                                                                                                           |                                                                                            |
|--------------------------|----------------------------------------------------------------------------------------------------------|------------------------------------------------------------------------------------------------------------------------------------------------------------------------------------------------------------------------------------------------------------------------------------------------------------------|---------------------------------------------------------------------------------------------------------------------------------------------------------------------------------------------------------------------------------------------------------------------------------------------------------------------------------------------|---------------------------------------------------------------------------------------------------------------------------------------------------------------------------|--------------------------------------------------------------------------------------------|
| Simmons <sup>42</sup>    | Barcelona, Cambridge, Vienna, Leuven, Copenhagen, Poznan, Padova, Galway, Amsterdam, Jan 2012 – Aug 2013 | Singleton pregnancy, ≥18 years, <20 weeks Gestation, pre-pregnancy BMI ≥29kg/m <sup>2</sup> . Excluded: pre-existing diabetes, inability to walk ≥100m, requiring a complex diet, chronic medical condition, psychiatric illness Sample: 150 (50 HE, 50 PA, 50 HE + PA) Final analyses: 31 HE, 30 PA, 34 HE + PA | Five face-to-face sessions and 4 x optional phone sessions with either PA, HE or a combination of both. Duration: 25 weeks                                                                                                                                                                                                                  | HE: 7.6±5.3<br>PA: 9.6±4.3<br>HE + PA: 8.5±4.2<br><i>HE vs HE+PA p</i> = 0.39<br><i>HE vs PA p</i> = 0.02<br><i>HE+PA vs PA p</i> = 0.24<br>GWG: Randomization - 37 weeks | Random: Low<br>AC: Low<br>Blinding: Low<br>Data: High<br>SR: Unclear<br>Other: Unclear     |
| Skouteris <sup>109</sup> | Melbourne, Australia Aug 2011 – Aug 2013                                                                 | Singleton pregnancy, >18 years old, <18 weeks gestation. Sample: 261 (131 int, 130 con) Final analyses: 131 int, 130 con                                                                                                                                                                                         | Int: Individual and group health coaching regarding healthy LS for weight management, mood and body image. An initial individual session followed by two phone-calls and two group sessions regarding healthy behaviours.<br>Con: Two 2-hour education sessions similar to the group sessions in the intervention group. Duration: 24 weeks | Int: 12.8±6.7<br>Con: 12.1±6.8<br><i>p</i> = 0.38<br>GWG: Pre-pregnancy - delivery                                                                                        | Random: Low<br>AC: Low<br>Blinding: Low<br>Data: Unclear<br>SR: Unclear<br>Other: Low      |
| Thomson <sup>43</sup>    | Lower Mississippi, United States Apr 2013 – May 2015                                                     | Singleton pregnancy, <19 weeks, >18 years, 1 <sup>st</sup> – 3 <sup>rd</sup> child. Excluded: NR Sample: 105 (54 PATE, 51 PAT) Final analyses (ITT): PATE 43, PAT 39                                                                                                                                             | PAT: One-on-one home visits, monthly group meetings, developmental screenings and a resource network for families.<br>PATE: PAT curriculum plus greater emphasis on healthy eating and GWG in pregnancy. Activities, DVDs and goal setting for diet and exercise. Duration: 22 weeks                                                        | PAT: 13.8 ±10.2<br>PATE: 10.9±8.7<br><i>Significance not reported</i><br>GWG: Pre-pregnancy to delivery (both self-reported)                                              | Random: Low<br>AC: Unclear<br>Blinding: Unclear<br>Data: Unclear<br>SR: High<br>Other High |
| Vesco <sup>113</sup>     | Oregon and Washington, United States Oct 2009 - July 2011                                                | Singleton pregnancy, > 18 years, obese. Excluded: diabetes, medical conditions requiring nutrition care. Sample: 118 (58 int, 60 con) Final analyses: 56 int, 57 con                                                                                                                                             | Two individual counselling sessions at baseline and weekly group sessions to assist women to maintain their weight within 3% of their baseline weight. Dietary advice was based on DASH diet. Women were advised to participate in 30 mins of moderate PA per day. Duration: 19-32 weeks                                                    | Int: 5.0±4.1<br>Con: 8.4±4.7<br><i>p</i> < 0.01<br>GWG: Randomization - 34 weeks                                                                                          | Random: Low<br>AC: High<br>Blinding: Unclear<br>Data: Low<br>SR: Unclear<br>Other: Low     |
| Vinter <sup>41</sup>     | Odense, Denmark Oct 2007 – Oct 2010                                                                      | Singleton pregnancy, 18-40 years, 10-14 weeks gestation, obese. Excluded: chronic medical disorders, previous obstetric complications. Sample 360 (180 int, 180 con) Final analyses: 150 int, 154 con                                                                                                            | Four dietary counselling sessions to limit GWG to 5kg. Energy based on BMI and 30-60 mins PA per day encouraged. Women provided with pedometer, gym membership, and one training session per week. Duration: 20 weeks                                                                                                                       | Int: 7.0 (4.7 – 10.6) <sup>c</sup><br>Con: 8.6 (5.7 – 11.5) <sup>c</sup><br><i>p</i> = 0.014<br>GWG: 15 – 35 weeks                                                        | Random: Low<br>AC: Low<br>Blinding: Unclear<br>Data: Low<br>SR: Low<br>Other: Low          |

|                    |                                            |                                                                                                                                               |                                                                                                                                     |                                                                                                                                        |                                                                                             |
|--------------------|--------------------------------------------|-----------------------------------------------------------------------------------------------------------------------------------------------|-------------------------------------------------------------------------------------------------------------------------------------|----------------------------------------------------------------------------------------------------------------------------------------|---------------------------------------------------------------------------------------------|
| Wang <sup>50</sup> | Peking,<br>China<br>Sep 2012 -<br>Jan 2013 | Singleton pregnancy, at least one risk factor<br>for GDM.<br>Excluded: diabetes.<br>Sample: 272 (134 int, 138 con)<br>Final analyses: Unclear | Three LS counselling sessions regarding diet, PA<br>and GWG. Reinforcement of LS advice given<br>accordingly.<br>Duration: 22 weeks | Early pregnancy<br>Int: 1.4±2.3<br>Con: 1.4±2.6<br><i>p</i> = 0.91<br>Mid-pregnancy<br>Int: 5.5±2.2<br>Con: 5.7±2.3<br><i>p</i> = 0.57 | Random: Unclear<br>AC: Unclear<br>Blinding: Unclear<br>Data: Low<br>SR: High<br>Other: High |
|--------------------|--------------------------------------------|-----------------------------------------------------------------------------------------------------------------------------------------------|-------------------------------------------------------------------------------------------------------------------------------------|----------------------------------------------------------------------------------------------------------------------------------------|---------------------------------------------------------------------------------------------|

<sup>a</sup>Gestational weight gain (kg): mean (standard deviation) unless otherwise stated.

<sup>b</sup>Based on Cochrane Collaboration Risk of Bias. Random = Randomization; AC = Allocation concealment; Blinding = Blinding of participants, personal and outcome; Data = Incomplete data; SR = Selective reporting; Other = Other bias.

<sup>c</sup>GWG (kg) median and range

Other acronyms and abbreviations in alphabetical order: BMI = body mass index, Con = control group, DASH = dietary approaches to stop hypertension, EUC = enhanced usual care, GI = glycemic index, GDM = gestational diabetes mellitus, GWG = gestational weight gain, HE = healthy eating, Int = intervention group, IOM = Institute of Medicine, LS = lifestyle, Mod = moderate, PA = Physical Activity, PAT = Parents as teachers, PATE/PAT+ = Parents as teachers enhanced
