# Supplementary material for: Attenuating Pregnancy Weight Gain—What Works and Why: A Systematic Review and Meta-Analysis
Source: MDPI journal article supplement (doi:10.3390/nu10070944), 2018-07-22
Supplement: s1 [file s1]

**Table S6:** Description of eHealth interventions aimed at preventing excessive gestational weight gain.

| First author           | Setting and date                           | Population                                                                                                                                                                                                                                                                                                                        | Intervention                                                                                                                                                                                                                                                                       | GWG <sup>a</sup> and GWG measure                                                                                        | Quality <sup>b</sup>                                                                              |
|------------------------|--------------------------------------------|-----------------------------------------------------------------------------------------------------------------------------------------------------------------------------------------------------------------------------------------------------------------------------------------------------------------------------------|------------------------------------------------------------------------------------------------------------------------------------------------------------------------------------------------------------------------------------------------------------------------------------|-------------------------------------------------------------------------------------------------------------------------|---------------------------------------------------------------------------------------------------|
| Herring <sup>117</sup> | Philadelphia, United States<br>2013 – 2014 | Singleton pregnancy, > 18 years old, < 20 weeks gestation, BMI 25-45kg/m <sup>2</sup> in first trimester, African American Medicaid recipient, cell phone with text messaging, Facebook account.<br>Excluded: Requiring specialised nutrition care, tobacco use.<br>Sample: 66 (33 int, 33 con)<br>Final analyses: 27 int, 29 con | Promotion of behaviour change goals regarding energy intake, PA and self-weighing. Skills training and support were delivered using self-monitoring texts with personalised feedback, a closed Facebook group, and health coach calls throughout pregnancy.<br>Duration: 28 weeks  | Int: 8.7±6.6<br>Con: 12.3±6.4<br><i>p</i> < 0.05<br>GWG: Early pregnancy - delivery                                     | Random: Low<br>AC: Low<br>Blinding: Unclear<br>Data: Low<br>SR: Unclear<br>Other: Low             |
| Jackson <sup>121</sup> | San Francisco, United States               | Pregnant women, > 18 years old, < 26 weeks gestation.<br>Sample: 327 (158 int, 163 con)<br>Final analyses: 134 int 153 con                                                                                                                                                                                                        | A computerised Video Doctor program in a clinical setting as part of routine prenatal care. It included in-depth behavioural risk assessments, tailored counselling messages for both patient and clinician, a cueing sheet for the clinician, and worksheets<br>Duration: 4 weeks | Int: 15.1 (SD NR)<br>Con: 15.2 (SD NR)<br><i>p</i> = 0.95<br>GWG: Pre-pregnancy - delivery                              | Random: Unclear<br>AC: Unclear<br>Blinding: Unclear<br>Data: Low<br>SR: Unclear<br>Other: Unclear |
| Olsen <sup>119</sup>   | United States<br>May 2011 – Jul 2012       | Singleton pregnancy, < 20 weeks, 18-35 years. Excluded: BMI < 18.5 and >35, weight-affecting medications, no email.<br>Sample: 1689<br>Final analyses: 1126 int, 563 con                                                                                                                                                          | Int: Website with blogs, local resources, GWG trackers, PA goal setting tools and weekly emails.<br>Con: Access to control website with general pregnancy advice.<br>Duration: 28 weeks.                                                                                           | Int: 47.6% exceeded IOM<br>Con: 45.9% exceeded IOM<br><i>Not significant</i><br>GWG: First weight < 14 weeks – 37 weeks | Random: Low<br>AC: Low<br>Blinding: Unclear<br>Data: High<br>SR: High<br>Other: High              |
| Smith <sup>120</sup>   | United States<br>Jan 2013 – Sept 2013      | 18-45 years, relatively inactive, regular Internet access.<br>Excluded: History of GDM, pre-eclampsia, chronic disease, underweight, smoker, metabolic condition.<br>Sample: 51 (26 int, 25 con)<br>Final analyses: 24 int, 21 con                                                                                                | Web-based PA advice with information about goal-setting, problem solving, PA diary and forum. Website tutorial also provided.<br>Duration: 30 weeks                                                                                                                                | Int: 13.6±5.6<br>Con: 11.2±5.1<br><i>Not significant</i><br>GWG: Pre-pregnancy to 36 weeks                              | Random: Low<br>AC: Unclear<br>Blinding: Unclear<br>Data: Low<br>SR: High<br>Other: High           |
| Willcox <sup>118</sup> | Australia<br>May 2014 – Oct 2014           | Singleton pregnancy, 10-17 weeks, BMI > 25, English speaking, mobile phone.<br>Excluded: < 18 years, comorbidities requiring additional management.<br>Sample: 100 (50 int, 50 con)<br>Final analyses: 45 int, 46 con                                                                                                             | Multi-faceted mHealth intervention to promote healthy diet, PA and GWG. Intervention booklet, text messages, website, video messages and Facebook were used.<br>Duration: 21 weeks                                                                                                 | Int: 7.8±4.7<br>Con: 9.7±3.9<br><i>p</i> = 0.04<br>GWG: Baseline – 36 weeks                                             | Random: Low<br>AC: Low<br>Blinding: Unclear<br>Data: Low<br>SR: Low<br>Other: Unclear             |

<sup>a</sup>Gestational weight gain (kg): mean (standard deviation) unless otherwise stated.

<sup>b</sup>Based on Cochrane Collaboration Risk of Bias. Random = Randomization; AC = Allocation concealment; Blinding = Blinding of participants, personal and outcome; Data = Incomplete data; SR = Selective reporting; Other = Other bias.

Other acronyms and abbreviations in alphabetical order: BMI = body mass index, Con = control group, GI = glycemic index, GWG = gestational weight gain, HTN = hypertension, Int = intervention group, IOM = Institute of Medicine, NR = Not reported, PA = Physical Activity.
