# Supplementary material for: Attenuating Pregnancy Weight Gain—What Works and Why: A Systematic Review and Meta-Analysis
Source: MDPI journal article supplement (doi:10.3390/nu10070944), 2018-07-22
Supplement: s1 [file s1]

**Table S3:** Summary of study characteristics according to intervention type

|                                  |              | <b>Diet (n = 16)<br/>n (%)</b> | <b>Exercise (n = 27)<br/>n (%)</b> | <b>Lifestyle (n = 33)<br/>n (%)</b> | <b>eHealth (n = 5)<br/>(n %)</b> | <b>Other (n = 8)<sup>a</sup><br/>n (%)</b> | <b>Total (n = 89)<br/>n (%)</b> |
|----------------------------------|--------------|--------------------------------|------------------------------------|-------------------------------------|----------------------------------|--------------------------------------------|---------------------------------|
| <b>Commenced<br/>(Trimester)</b> |              |                                |                                    |                                     |                                  |                                            |                                 |
|                                  | 1            | 4 (25)                         | 14 (52)                            | 7 (21)                              | 2 (40)                           | 4 (50)                                     | 31 (35)                         |
|                                  | 2            | 11 (69)                        | 13 (48)                            | 26 (79)                             | 3 (60)                           | 4 (50)                                     | 57 (64)                         |
|                                  | 3            | 0 (0)                          | 0 (0)                              | 0 (0)                               | 0 (0)                            | 0 (0)                                      | 0 (0)                           |
|                                  | Unsure       | 1 (6)                          | 0 (0)                              | 0 (0)                               | 0 (0)                            | 0 (0)                                      | 1 (1)                           |
|                                  | <b>Total</b> | 16 (100)                       | 27 (100)                           | 33 (100)                            | 5 (100)                          | 8 (100)                                    | 89 (100)                        |
| <b>Duration<br/>(Weeks)</b>      |              |                                |                                    |                                     |                                  |                                            |                                 |
|                                  | <12          | 0 (0)                          | 0 (0)                              | 2 (6)                               | 1 (20)                           | 0 (0)                                      | 3 (3)                           |
|                                  | 12-29        | 14 (88)                        | 18 (67)                            | 28 (85)                             | 3 (60)                           | 7 (88)                                     | 70 (79)                         |
|                                  | ≥30          | 1 (6)                          | 9 (23)                             | 3 (9)                               | 1 (20)                           | 1 (13)                                     | 15 (17)                         |
|                                  | Unsure       | 1 (6)                          | 0 (0)                              | 0 (0)                               | 0 (0)                            | 0 (0)                                      | 1 (1)                           |
|                                  | <b>Total</b> | 16 (100)                       | 27 (100)                           | 33 (100)                            | 5 (100)                          | 8 (100)                                    | 89 (100)                        |
| <b>Intensity<br/>(Hours)</b>     |              |                                |                                    |                                     |                                  |                                            |                                 |
|                                  | <4           | 5 (31)                         | 2 (7)                              | 9 (27)                              | 1 (20)                           | 4 (50)                                     | 21 (24)                         |
|                                  | 4-8          | 6 (34)                         | 2 (7)                              | 6 (18)                              | 0 (0)                            | 0 (0)                                      | 14 (16)                         |
|                                  | >8           | 3 (19)                         | 22 (81)                            | 12 (36)                             | 0 (0)                            | 2 (25)                                     | 39 (44)                         |
|                                  | Unsure       | 2 (13)                         | 1 (4)                              | 6 (18)                              | 4 (80)                           | 2 (25)                                     | 15 (17)                         |
|                                  | <b>Total</b> | 16 (100)                       | 27 (100)                           | 33 (100)                            | 5 (100)                          | 8 (100)                                    | 89 (100)                        |
| <b>Frequency<br/>(Contact)</b>   |              |                                |                                    |                                     |                                  |                                            |                                 |
|                                  | ≤3           | 5 (31)                         | 2 (7)                              | 5 (15)                              | 1 (20)                           | 2 (25)                                     | 15 (17)                         |
|                                  | 4-7          | 4 (25)                         | 2 (7)                              | 9 (27)                              | 0 (0)                            | 1 (13)                                     | 16 (18)                         |
|                                  | ≥8           | 7 (44)                         | 22 (81)                            | 19 (58)                             | 0 (0)                            | 5 (63)                                     | 53 (60)                         |
|                                  | Unsure       | 0 (0)                          | 1 (4)                              | 0 (0)                               | 4 (80)                           | 0 (0)                                      | 5 (6)                           |
|                                  | <b>Total</b> | 16 (100)                       | 27 (100)                           | 33 (100)                            | 5 (100)                          | 8 (100)                                    | 89 (100)                        |
| <b>Delivery method</b>           |              |                                |                                    |                                     |                                  |                                            |                                 |
|                                  | Individual   | 15 (94)                        | 9 (23)                             | 22 (67)                             | 3 (60)                           | 8 (100)                                    | 57 (64)                         |
|                                  | Group        | 0 (0)                          | 12 (44)                            | 8 (24)                              | 0 (0)                            | 0 (0)                                      | 20 (2)                          |
|                                  | Mixed        | 1 (6)                          | 2 (7)                              | 2 (6)                               | 2 (40)                           | 0 (0)                                      | 7 (8)                           |
|                                  | Unsure       | 0 (0)                          | 4 (15)                             | 1 (3)                               | 0 (0)                            | 0 (0)                                      | 5 (6)                           |
|                                  | <b>Total</b> | 16 (100)                       | 27 (100)                           | 33 (100)                            | 5 (100)                          | 8 (100)                                    | 89 (100)                        |

<sup>a</sup>Other included pharmacological, adolescent, routine weighing
