# Supplementary material for: Attenuating Pregnancy Weight Gain—What Works and Why: A Systematic Review and Meta-Analysis
Source: MDPI journal article supplement (doi:10.3390/nu10070944), 2018-07-22
Supplement: s1 [file s1]

**Table S8:** Random-effects meta-analyses for diet, physical activity, lifestyle and eHealth interventions (WMD and 95% CI), studies with a high risk of bias removed.

|                   | Sub-group and overall                         | Studies <sup>a</sup> | Participants | Overall effect size<br>WMD (95% CI) | p value         | I <sup>2</sup> |
|-------------------|-----------------------------------------------|----------------------|--------------|-------------------------------------|-----------------|----------------|
| Diet              | <b>Overall: Measurement GWG &gt; 24 weeks</b> | <b>8</b>             | <b>1949</b>  | <b>-3.25 (-5.11, -1.40)</b>         | <b>&lt;0.00</b> | <b>93.5%</b>   |
| Physical activity | Measurement GWG 12-24 weeks                   | 2                    | 215          | -1.23 (-4.66, 2.19)                 | 0.48            | 90.2%          |
|                   | Measurement GWG > 24 weeks                    | 15                   | 3134         | -0.99 (-1.66, -0.32)                | <0.00           | 84.7%          |
|                   | <b>Overall</b>                                | <b>17</b>            | <b>3349</b>  | <b>-1.04 (-1.70, -0.38)</b>         | <b>&lt;0.00</b> | <b>85.4%</b>   |
| Lifestyle         | Measurement GWG 12-24 weeks                   | 3                    | 2908         | -0.37 (-0.95, 0.21)                 | 0.21            | 42.9%          |
|                   | Measurement GWG > 24 weeks                    | 18                   | 4371         | -0.83 (-1.38, -0.28)                | <0.00           | 68.5%          |
|                   | <b>Overall</b>                                | <b>21</b>            | <b>7279</b>  | <b>-0.73 (-1.17, -0.29)</b>         | <b>&lt;0.00</b> | <b>65.7%</b>   |
| eHealth           | <b>Overall: Measurement GWG &gt; 24 weeks</b> | <b>2</b>             | <b>147</b>   | <b>-2.26 (-3.84, -0.69)</b>         | <b>&lt;0.00</b> | <b>0.00%</b>   |

<sup>a</sup> Some studies included sub-groups as no overall GWG was reported.
