# Supplementary material for: Attenuating Pregnancy Weight Gain—What Works and Why: A Systematic Review and Meta-Analysis
Source: MDPI journal article supplement (doi:10.3390/nu10070944), 2018-07-22
Supplement: s1 [file s1]

**Table S1:** MEDLINE search strategy for interventions aimed at preventing excessive gestational weight gain (modified to suit other databases when necessary)

|    |                                                 |
|----|-------------------------------------------------|
| 1  | pregnan*.tw                                     |
| 2  | exp Pregnancy/                                  |
| 3  | gestational diabetes.tw                         |
| 4  | exp Diabetes, Gestational/                      |
| 5  | antenatal.tw                                    |
| 6  | exp Prenatal Care/                              |
| 7  | 1 or 2 or 3 or 4 or 5 or 6                      |
| 8  | intervention*.tw                                |
| 9  | Exp Early Medical Intervention/                 |
| 10 | diet*.tw                                        |
| 11 | nutrition*.tw                                   |
| 12 | exp Diet/ or exp Diet Therapy/                  |
| 13 | pharmacotherapy*.tw                             |
| 14 | exp Drug Therapy/                               |
| 15 | (eHealth or e-Health or mHealth or m-Health).tw |

|    |                                        |
|----|----------------------------------------|
| 16 | (smartphone or SMS or text messag*).tw |
| 17 | Exp Text Messaging/                    |
| 18 | Exp Telemedicine/                      |
| 19 | exercise*.tw                           |
| 20 | (physic* adj1 activ*).tw               |
| 21 | Exp Exercise/ or exp Exercise Therapy/ |
| 22 | sleep*.tw                              |
| 23 | (nap or naps or napping).tw            |
| 24 | snor*.te                               |
| 25 | apn?ea.tw                              |
| 26 | exp Sleep/                             |
| 27 | counsel*.tw                            |
| 28 | exp Counseling/                        |
| 29 | exp Behavior Therapy                   |
| 30 | lifestyle.tw                           |
| 31 | life style.tw                          |
| 32 | exp Life Style/                        |

|    |                                                                                                                                                     |
|----|-----------------------------------------------------------------------------------------------------------------------------------------------------|
| 33 | 8 or 9 or 10 or 11 or 12 or 13 or 14 or 15 or 16 or 17 or 18 or 19 or 20 or 21 or 22<br>or 23 or 24 or 25 or 26 or 27 or 28 or 29 or 30 or 31 or 32 |
| 34 | weight.tw                                                                                                                                           |
| 35 | exp body weight/ or exp birth weight/ or exp body weight changes/ or exp<br>weight gain/ or exp weight loss/                                        |
| 36 | 34 or 35                                                                                                                                            |
| 37 | 7 and 33 and 36                                                                                                                                     |
| 38 | Randomi#ed controlled trial.pt                                                                                                                      |
| 29 | Controlled clinical trial.pt                                                                                                                        |
| 40 | randomi#ed.ab.                                                                                                                                      |
| 41 | placebo.ab                                                                                                                                          |
| 42 | clinical trials as topic.sh.                                                                                                                        |
| 43 | randomly.ab                                                                                                                                         |
| 44 | trial.ti                                                                                                                                            |
| 45 | 38 or 39 or 40 or 41 or 42 or 43 or 44                                                                                                              |
| 46 | Animals/                                                                                                                                            |
| 47 | Humans/                                                                                                                                             |

|    |           |
|----|-----------|
| 48 | 46 not 47 |
| 49 | 45 not 48 |
| 50 | 37 and 49 |
