# Supplementary material for: Attenuating Pregnancy Weight Gain—What Works and Why: A Systematic Review and Meta-Analysis
Source: Nutrients. 2018 Jul 22;10(7):944. doi: 10.3390/nu10070944 (PMC6073617; doi:10.3390/nu10070944)
Supplement: Supplementary file 1 [file nutrients-10-00944-s001.zip]

Archive with 16 entries (16 files):
- Figure S1_Diet Meta-analysis.pdf
- Figure S2_PA Meta-analysis.pdf
- Figure S3_LS Meta-analysis.pdf
- Figure S4_eHealth Meta-analysis.pdf
- Figure S5_Diet Funnel Plot.pdf
- Figure S6_PA Funnel Plot.pdf
- Figure S7_LS Funnel Plot.pdf
- Figure S8_eHealth Funnel Plot.pdf
- Table S1_Medline Search Strategy.pdf
- Table S2_ Diet Interventions_Results Summary.pdf
- Table S3_Summary of study characterisitics (1).pdf
- Table S4_ PA Interventions_Results Summary.pdf
- Table S5_ LS Interventions_Results Summary.pdf
- Table S6_ eHealth Interventions_Results Summary.pdf
- Table S7_ Other Interventions_Results Summary.pdf
- Table S8_Sensitivity analyses_High risk removed.pdf
